# Supplementary material for: Overexpression of Ginkbilobin-2 homologous domain gene to enhance the tolerance to Phytophthora cinnamomi in plants of European chestnut
Source: Research Square preprint supplement (doi:10.21203/rs.3.rs-7973831/v1), 2025-11-17
Supplement: Supplementary file 1 [file 7cebe7ee88d173b7c5d3b2a4.docx]

| Line | CT Mean | CT Standard deviation | Estimated copy number1 |
| --- | --- | --- | --- |
| CI-3-WT | 32,71 | 2,32 | 0 |
| CI-3-G1 | 23,95 | 1,03 | 1 |
| CI-3-G3 | 23,37 | 0,48 | 1 |
| CI-9-WT | 30,22 | 0,51 | 0 |
| CI-9-G1 | 22,35 | 0,64 | 1 |
| CI-9-G4 | 22,47 | 0,46 | 1 |
| CI-9-G11 | 23,65 | 0,73 | 1 |
| CI-9-G12 | 23,74 | 1,40 | 1 |

**Table 1.** Estimated copy number in *C. sativa* somatic embryogenic lines transformed with *Cast_Gnk2-like* gene.

1 Values from the correlation between the quantity of plasmid and the number of copies in *C. sativa*, as described in Material and Methods.
