# Supplementary material for: Overexpression of Ginkbilobin-2 homologous domain gene to enhance the tolerance to Phytophthora cinnamomi in plants of European chestnut
Source: Research Square preprint supplement (doi:10.21203/rs.3.rs-7973831/v1), 2025-11-17
Supplement: Supplementary file 1 [file 3185c17335ca8500c7ff526d.pdf]

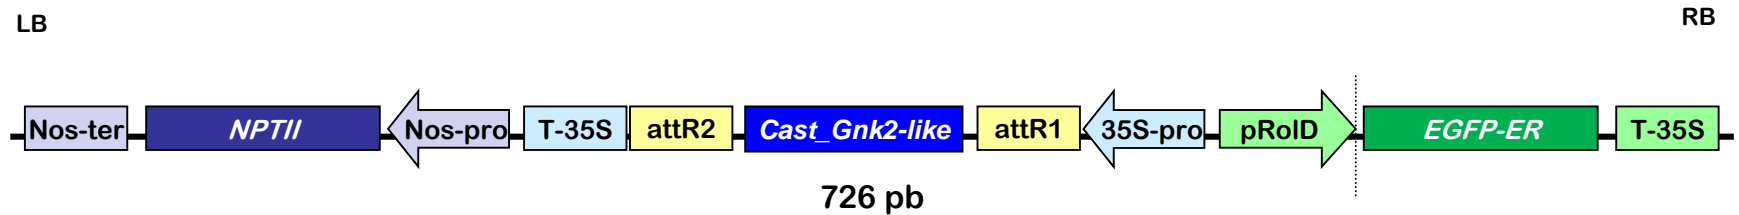

**Supplementary information 1.** A schematic representation of T-DNA region of the plasmid pK7WG2D-GIN. *nos-ter*, *nos-pro* terminator and promoter of nopaline synthase gene, respectively; *NPTII* neomycin phosphotransferase marker gene; *35S-pro*, *T-35S* promoter and terminator of Cauliflower mosaic virus gene, respectively; *EGFP-ER* green fluorescence protein gene; *Cast\_Gnk2-like* gene encoding a Ginkbilobin-2 protein; *proID* rol root loci D promoter; *RB* right border; *LB* left border.
