# Supplementary material for: Overexpression of Ginkbilobin-2 homologous domain gene to enhance the tolerance to Phytophthora cinnamomi in plants of European chestnut
Source: Research Square preprint supplement (doi:10.21203/rs.3.rs-7973831/v1), 2025-11-17
Supplement: Supplementary file 2 [file f9f72abfffa1b9dde9657b2f.docx]

| **Table 2**. Plant regeneration performance with only root development, only shoot development and conversion into plantlets (root and shoot development) of different chestnut transformed and untransformed lines (WT) after 8 weeks on germination medium. | | | | | | |
| --- | --- | --- | --- | --- | --- | --- |
| **LINE** | **ONLY ROOT** | | **ONLY SHOOT** | | **CONVERSION**  **(root + shoot)** | **TOTAL PLANT REGENERATION** |
| (%) | RL (mm) | (%) | SL (mm) | (%) | % |
| **LINES CI-3** |  |  |  |  |  |  |
| **CI-3-WT** | 33.3 ± 6.5 | 14.7 ± 3.6 | 12.5 ± 5.7 | 7.5 ± 0.3 | 25.0 ± 11.3 | 37.5 |
| **CI-3-G1** | 20.8 ± 3.3 | 12.2 ± 1.6 | 8.3 ± 3.3 | 6.5 ± 0.8 | 4.2 ± 3.3 | 12.5 |
| **CI-3-G3** | 25.0 ± 5.7 | 10.8 ± 1.5 | 4.2 ± 3.3 | 7.0 ± 0.6 | 4.2 ± 3.3 | 8.4 |
| **LINES CI-9** |  |  |  |  |  |  |
| **CI-9-WT** | 20.8 ± 3.3 | 6.8 ± 0.4 | 8.3 ± 3.3 | 7.5 ± 0.6 | 8.3 ± 0.6 | 16.6 |
| **CI-9-G1** | 8.3 ± 3.3 | 7.5 ± 0.8 | 4.2 ± 3.3 | 7.0 ± 0.0 | 0.0 ± 0.0 | 4.2 |
| **CI-9-G4** | 8.3 ± 3.3 | 8.0 ± 0.0 | 0.0 ± 0.0 | - | 0.0 ± 0.0 | 0.0 |
| **CI-9-G11** | 12.5 ± 5.7 | 7.8 ± 0.4 | 4.2 ± 3.3 | 8.0 ± 0.0 | 0.0 ± 0.0 | 4.2 |
| **CI-9-G12** | 16.7 ± 3.3 | 7.3 ± 0.9 | 4.2 ± 3.3 | 7.5 ± 0.0 | 4.2 ± 3.3 | 8.4 |
| Each value represents the mean ± standard error of 3 replications with 8 somatic embryos in each replicate. RL, root length; SL, shoot length. 1Total Plan Regeneration is obtained from the sum of only shoot rate and plant conversion rate. | | | | | | |
